# Supplementary material for: Hydrogel-Film-Fabricated Fluorescent Biosensors with Aggregation-Induced Emission for Albumin Detection through the Real-Time Modulation of a Vortex Fluidic Device
Source: MDPI journal article supplement (doi:10.3390/molecules28073244), 2023-04-05
Supplement: s1 [file s1]

# Supporting information

## Hydrogel-Film-Fabricated Fluorescent Biosensors with Aggregation-Induced Emission for Albumin Detection through the Real-Time Modulation of a Vortex Fluidic Device

Qi Hu <sup>1,2</sup>, Xuan Luo <sup>2</sup>, Damian Tohl <sup>1</sup>, Anh Tran Tam Pham <sup>1</sup>, Colin Raston <sup>2</sup> and Youhong Tang <sup>1,2,\*</sup>

<sup>1</sup> Australia-China Joint Research Centre on Personal Health Technologies, Medical Device Research Institute, Flinders University, Adelaide, SA 5042, Australia

<sup>2</sup> Institute for NanoScale Science and Technology, College of Science and Engineering, Flinders University, Adelaide, SA 5042, Australia

\* Correspondence: youhong.tang@flinders.edu.au; Tel.: +61-8-82012138

## Table of Figures

|                                                                                                                                                                                                                                                                                                                                                                                                                                                                                                                                                                                                                                                      |   |
|------------------------------------------------------------------------------------------------------------------------------------------------------------------------------------------------------------------------------------------------------------------------------------------------------------------------------------------------------------------------------------------------------------------------------------------------------------------------------------------------------------------------------------------------------------------------------------------------------------------------------------------------------|---|
| <b>Figure S1.</b> $^1\text{H}$ NMR in DMSO for TC426. ....                                                                                                                                                                                                                                                                                                                                                                                                                                                                                                                                                                                           | 4 |
| <b>Figure S2.</b> The mould of hydrogel film. (A) Template of flat design illustration and the diameter is 25 mm; (B) Template of spatial design illustration and thickness is 2 mm. ....                                                                                                                                                                                                                                                                                                                                                                                                                                                            | 5 |
| <b>Figure S3.</b> Hydrogel film with embedded AIE biosensor <b>TC426</b> reacting with different concentrations of HSA solution. Fluorescence spectra of (A) <b>AAm-Alg + TC426</b> and (B) <b>Carrageenan + TC426</b> in the presence of HSA in the range of 0 to 1000 mg/L; $[\text{TC426}] = 10 \mu\text{M}$ , $\lambda_{\text{ex}} = 480 \text{ nm}$ . ....                                                                                                                                                                                                                                                                                      | 6 |
| <b>Figure S4.</b> <b>Acrylamide + Alginate + TC426</b> Hydrogel film for real observation. (A) Monitoring of colour change and swelling change from 0 to 10 min during normal soaking testing; (B) Monitoring of colour change and swelling change from 0 to 10 min during VFD testing. $[\text{TC426}] = 10 \mu\text{M}$ , $[\text{HSA}] = 2000 \text{ mg/L}$ , $\lambda_{\text{ex}} = 480 \text{ nm}$ , $I_0$ equals the intensity of $[\text{HSA}] = 0 \text{ mg/L}$ . ....                                                                                                                                                                       | 7 |
| <b>Figure S5.</b> <b>Carrageenan + TC426</b> Hydrogel film for real observation. (A) Monitoring of colour change and swelling change from 0 to 10 min during normal soaking testing; (B) Monitoring of colour change and swelling change from 0 to 10 min during VFD testing. $[\text{TC426}] = 10 \mu\text{M}$ , $[\text{HSA}] = 2000 \text{ mg/L}$ , $\lambda_{\text{ex}} = 480 \text{ nm}$ , $I_0$ equals the intensity of $[\text{HSA}] = 0 \text{ mg/L}$ . ....                                                                                                                                                                                 | 8 |
| <b>Figure S6.</b> Hydrogel film for normal soaking testing and VFD processing testing. (A) <b>Acrylamide + Alginate + TC426</b> and (C) <b>Carrageenan + TC426</b> for time effect on variation of intensity and swelling ratio from 0 to 10 min during normal soaking testing; (B) <b>Acrylamide + Alginate + TC426</b> and (D) <b>Carrageenan + TC426</b> for time effect on variation of intensity and swelling ratio from 0 to 10 min during VFD testing. $[\text{TC426}] = 10 \mu\text{M}$ , $[\text{HSA}] = 2000 \text{ mg/L}$ , $\lambda_{\text{ex}} = 480 \text{ nm}$ , $I_0$ equals the intensity of $[\text{HSA}] = 0 \text{ mg/L}$ . .... | 9 |
| <b>Figure S7.</b> Comparison between <b>AAm + Alg + TC426</b> film and <b>Carrageenan + TC426</b> film. (A) Loss ratio from 0 to 10 min during VFD testing. (B) Time effect when VFD processing is                                                                                                                                                                                                                                                                                                                                                                                                                                                   |   |

immediately completed and 3 hours after the completion. [TC426] = 10  $\mu$ M, [HSA] = 2000 mg/L,  $\lambda_{\text{ex}}$  = 480 nm, VFD was conducted for 2 minutes and 4 minutes, towards **AAm + Alg + TC426** and **Carrageenan + TC426** respectively..... 10

**Figure S8.** Change in the fraction of swelling power ( $F_{\text{sp}}$ ) vs. time to identify the diffusion mechanism in normal soaking and VFD tests of (A) **Carrageenan + TC426** film and (B) **AAm + Alg + TC426** film..... 11

**Figure S9.** The images of optical microscopy in reflected light. (A) **AAm + Alg** hydrogel film only, 100  $\mu$ m; (B) **AAm + Alg** hydrogel film + HSA, [HSA] = 2000 mg/L, 100  $\mu$ m; (C) **AAm + Alg** hydrogel film + **TC426**, [TC426] = 10 $\mu$ M, 100  $\mu$ m; (D) **AAm + Alg** hydrogel film + HSA + **TC426**, [HSA] = 2000 mg/L and [TC426] = 10 $\mu$ M, 100  $\mu$ m. .... 12

**Figure S10.** The images of optical microscopy in reflected light. (A) **Carrageenan** hydrogel film only, 100  $\mu$ m; (B) **Carrageenan** hydrogel film + HSA, [HSA] = 2000 mg/L, 200  $\mu$ m; (C) **Carrageenan** hydrogel film + **TC426**, [TC426] = 10 $\mu$ M, 100  $\mu$ m; (D) **Carrageenan** hydrogel film + HSA + **TC426**, [HSA] = 2000 mg/L and [TC426] = 10 $\mu$ M, 100  $\mu$ m. .... 13

**Figure S11.** The 3D structure of Portable Colorimetric Device for optical imaging analysis; Components illustration including camera group, environmental light-proof case, base, 4 LED modules and 4 reference points..... 14

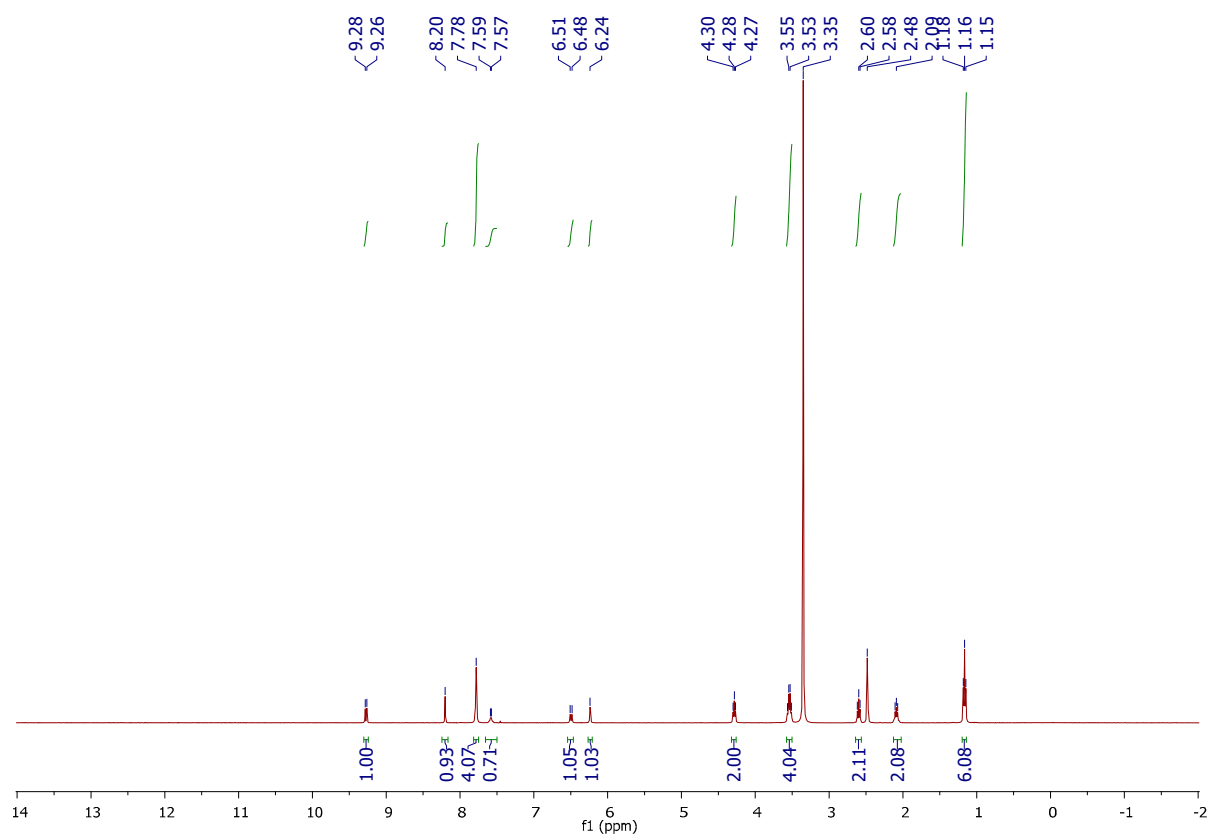

**Figure S1.**  $^1\text{H}$  NMR in DMSO for TC426 [s1].

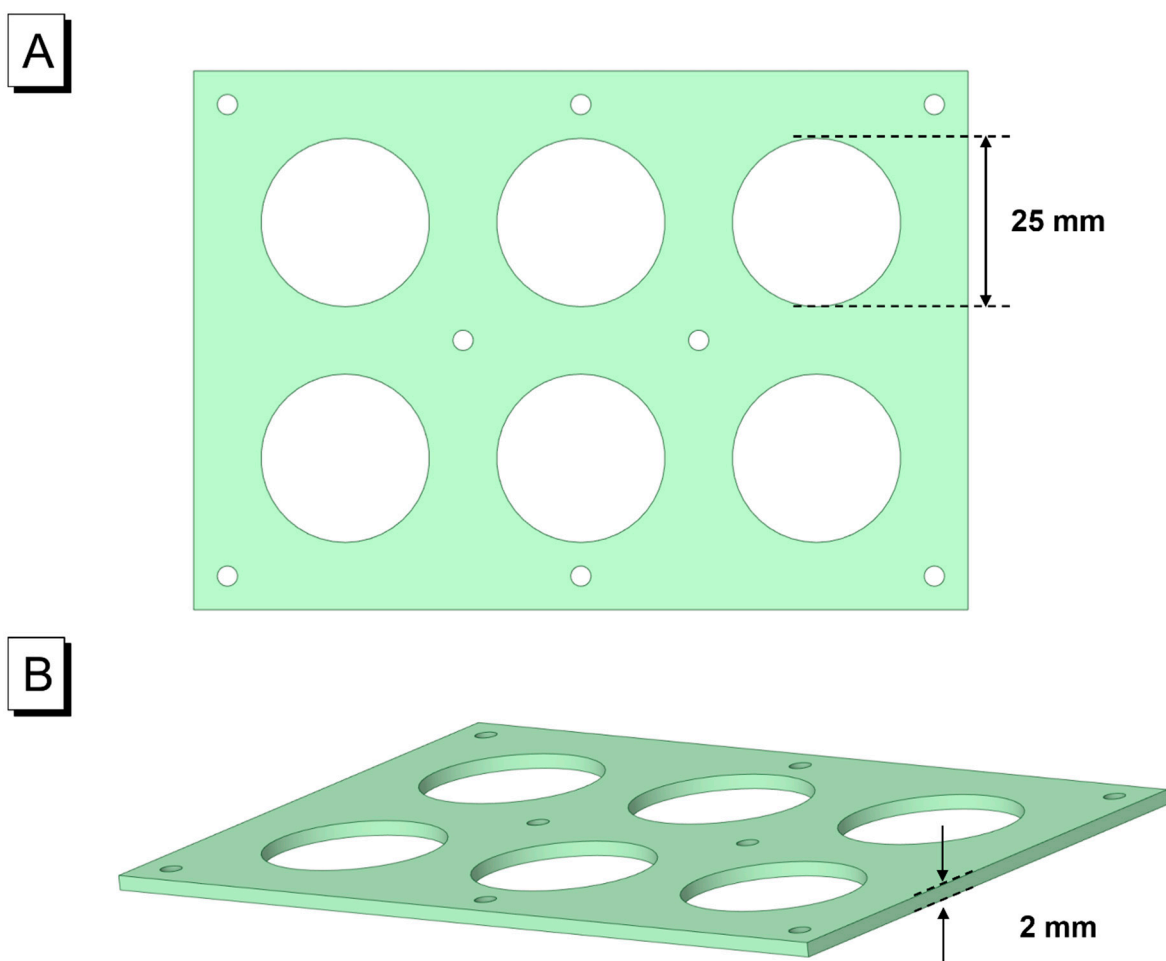

**Figure S2.** The mould of hydrogel film. (A) Template of flat design illustration and the diameter is 25 mm; (B) Template of spatial design illustration and thickness is 2 mm.

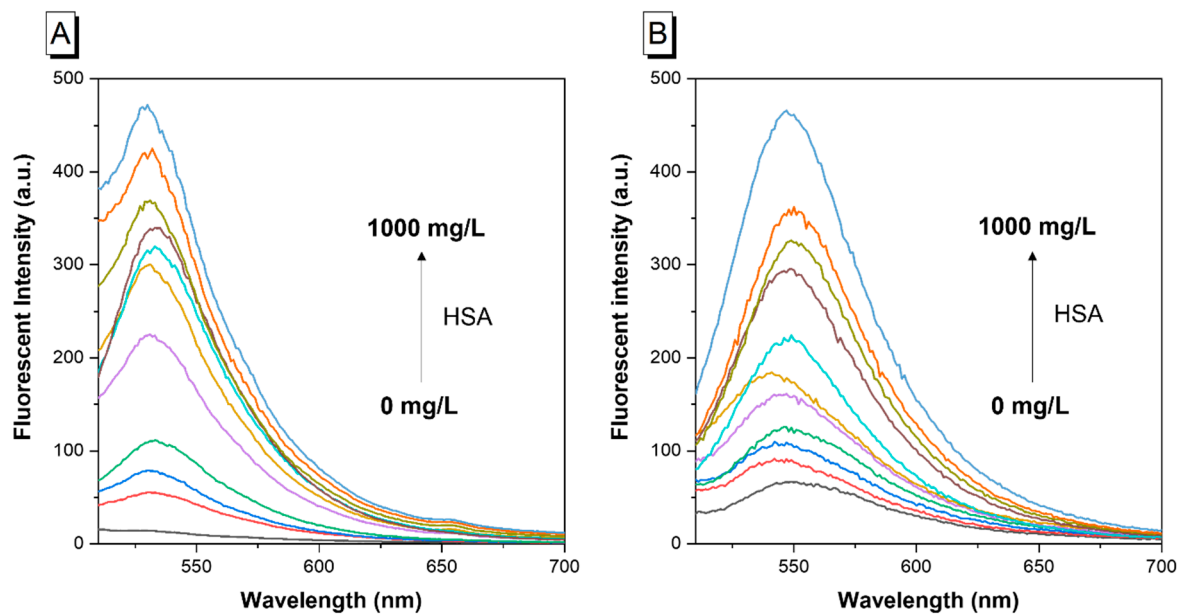

**Figure S3.** Hydrogel film with embedded AIE biosensor **TC426** reacting with different concentrations of HSA solution. Fluorescence spectra of (A) **AAm-Alg + TC426** and (B) **Carrageenan + TC426** in the presence of HSA in the range of 0 to 1000 mg/L; [TC426] = 10  $\mu$ M,  $\lambda_{\text{ex}}$  = 480 nm.

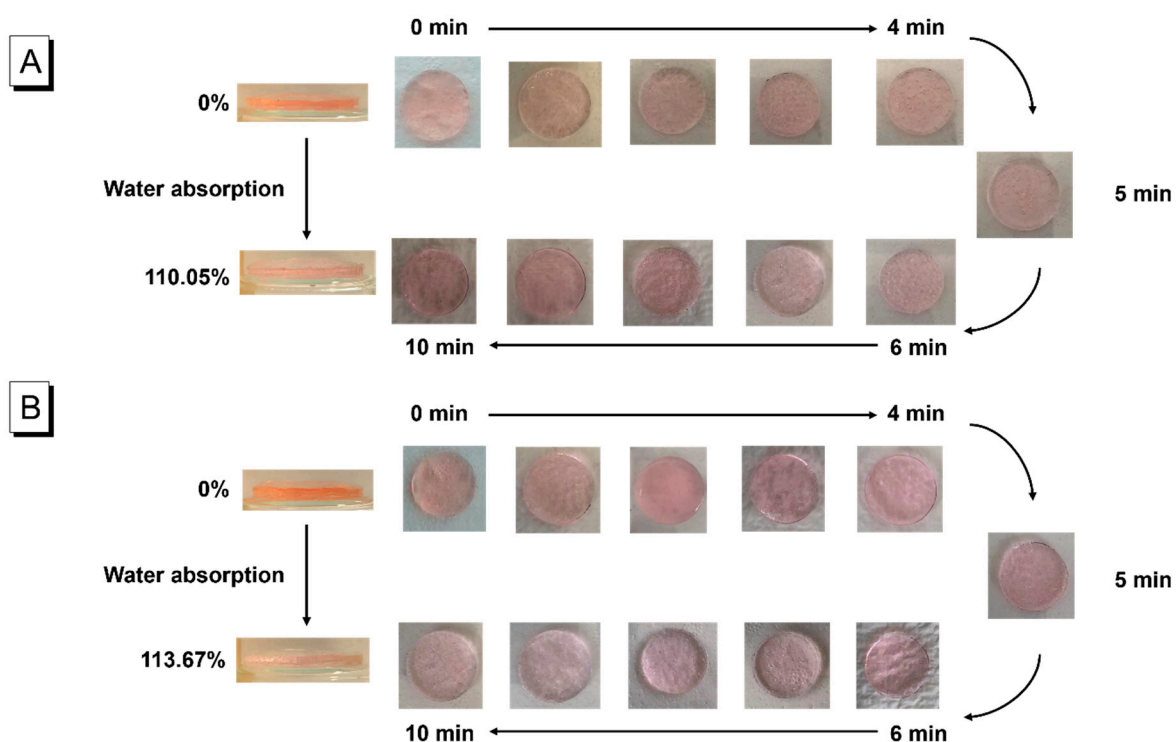

**Figure S4. Acrylamide + Alginate + TC426 Hydrogel film for real observation.** (A) Monitoring of colour change and swelling change from 0 to 10 min during normal soaking testing; (B) Monitoring of colour change and swelling change from 0 to 10 min during VFD testing. [TC426] = 10  $\mu$ M, [HSA] = 2000 mg/L,  $\lambda_{\text{ex}}$  = 480 nm,  $I_0$  equals the intensity of [HSA] = 0 mg/L.

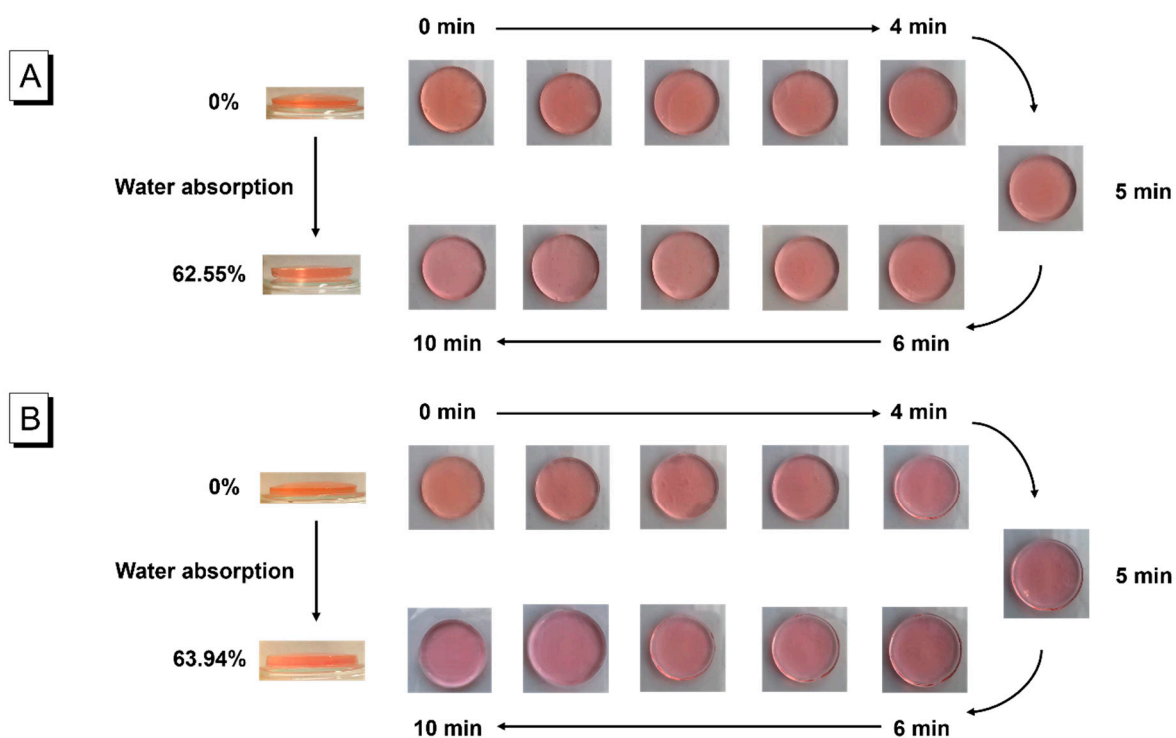

**Figure S5. Carrageenan + TC426 Hydrogel film for real observation.** (A) Monitoring of colour change and swelling change from 0 to 10 min during normal soaking testing; (B) Monitoring of colour change and swelling change from 0 to 10 min during VFD testing. [TC426] = 10  $\mu$ M, [HSA] = 2000 mg/L,  $\lambda_{\text{ex}}$  = 480 nm,  $I_0$  equals the intensity of [HSA] = 0 mg/L.



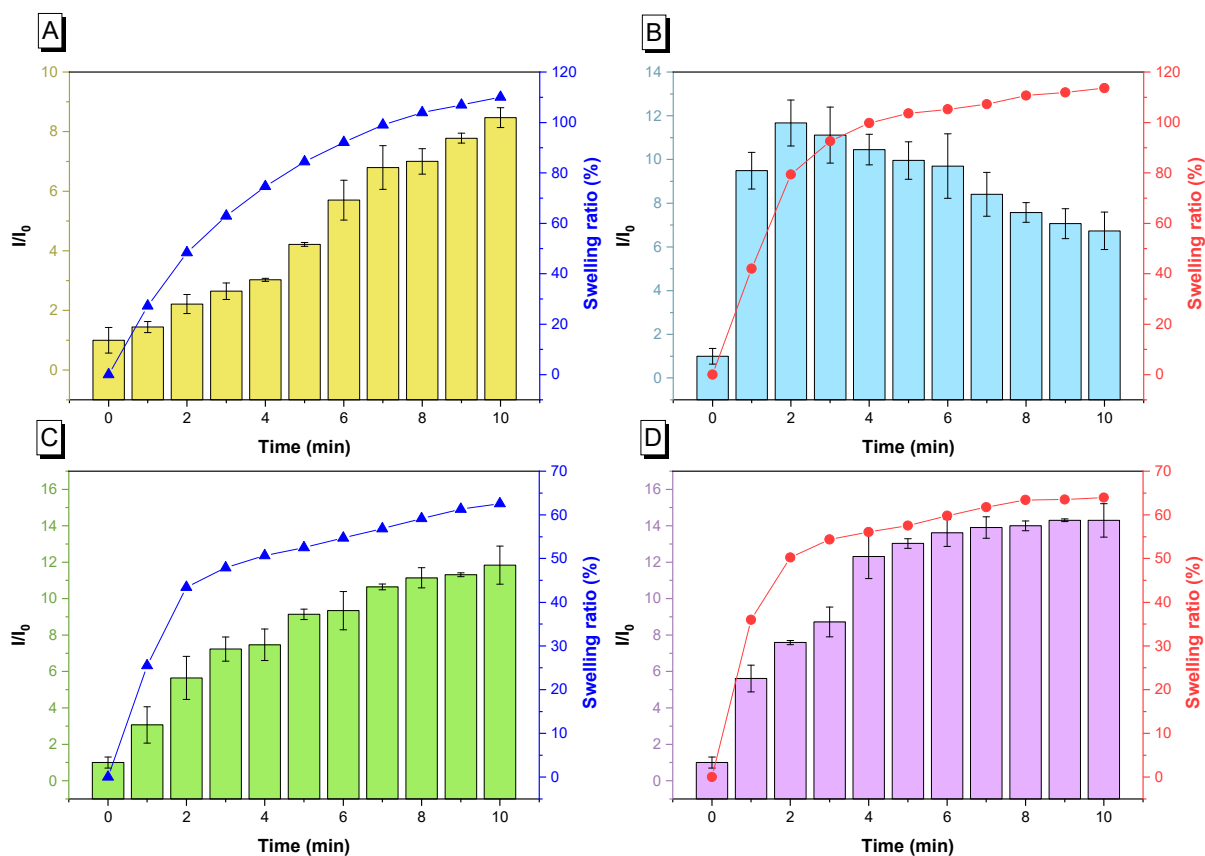

**Figure S6.** Hydrogel film for normal soaking testing and VFD processing testing. (A) **Acrylamide + Alginate + TC426** and (C) **Carrageenan + TC426** for time effect on variation of intensity and swelling ratio from 0 to 10 min during normal soaking testing; (B) **Acrylamide + Alginate + TC426** and (D) **Carrageenan + TC426** for time effect on variation of intensity and swelling ratio from 0 to 10 min during VFD testing. [TC426] = 10  $\mu$ M, [HSA] = 2000 mg/L,  $\lambda_{ex}$  = 480 nm,  $I_0$  equals the intensity of [HSA] = 0 mg/L.

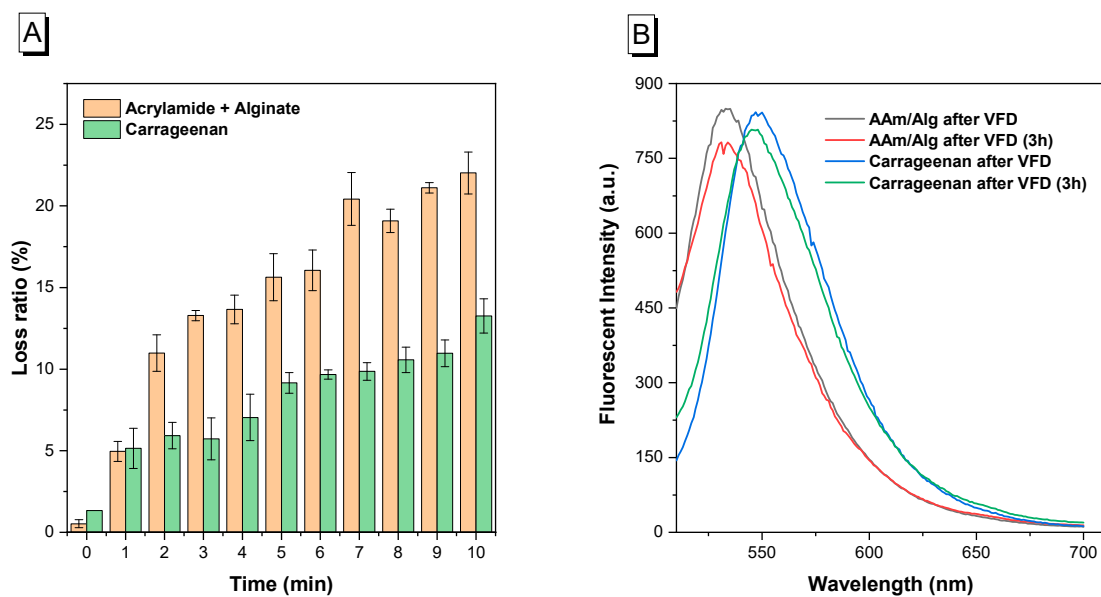

**Figure S7.** Comparison between **AAm + Alg + TC426** film and **Carrageenan + TC426** film. (A) Loss ratio from 0 to 10 min during VFD testing. (B) Time effect when VFD processing is immediately completed and 3 hours after the completion.  $[\text{TC426}] = 10 \mu\text{M}$ ,  $[\text{HSA}] = 2000 \text{ mg/L}$ ,  $\lambda_{\text{ex}} = 480 \text{ nm}$ , VFD was conducted for 2 minutes and 4 minutes, towards **AAm + Alg + TC426** and **Carrageenan + TC426** respectively.

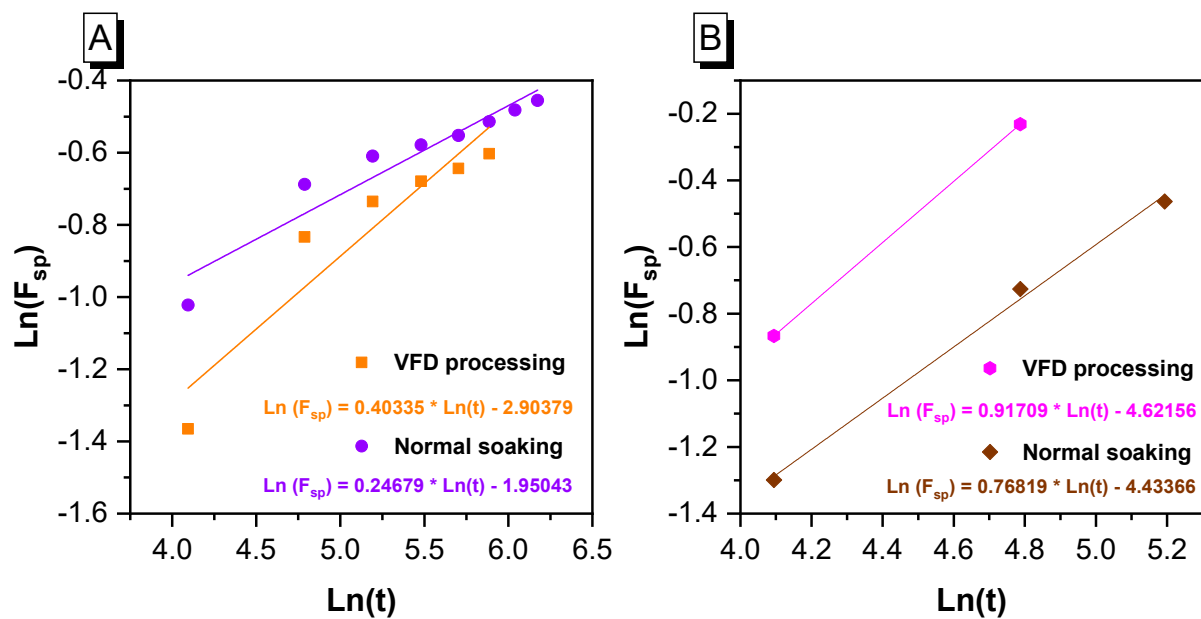

**Figure S8.** Change in the fraction of swelling power ( $F_{sp}$ ) vs. time to identify the diffusion mechanism in normal soaking and VFD tests of (A) **Carrageenan + TC426** film and (B) **AAm + Alg + TC426** film.

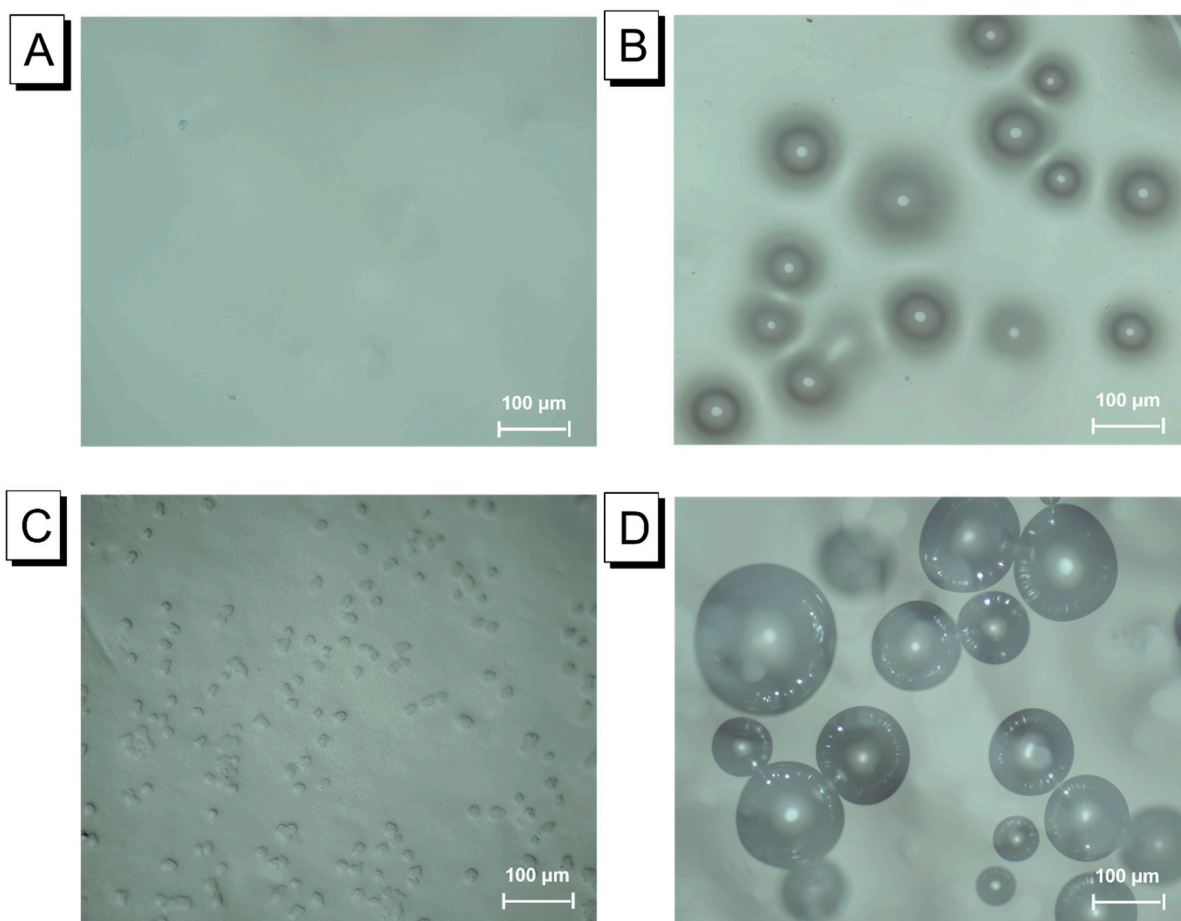

**Figure S9.** The images of optical microscopy in reflected light. (A) **AAm + Alg** hydrogel film only, 100  $\mu\text{m}$ ; (B) **AAm + Alg** hydrogel film + HSA,  $[\text{HSA}] = 2000 \text{ mg/L}$ , 100  $\mu\text{m}$ ; (C) **AAm + Alg** hydrogel film + **TC426**,  $[\text{TC426}] = 10\mu\text{M}$ , 100  $\mu\text{m}$ ; (D) **AAm + Alg** hydrogel film + HSA + **TC426**,  $[\text{HSA}] = 2000 \text{ mg/L}$  and  $[\text{TC426}] = 10\mu\text{M}$ , 100  $\mu\text{m}$ .

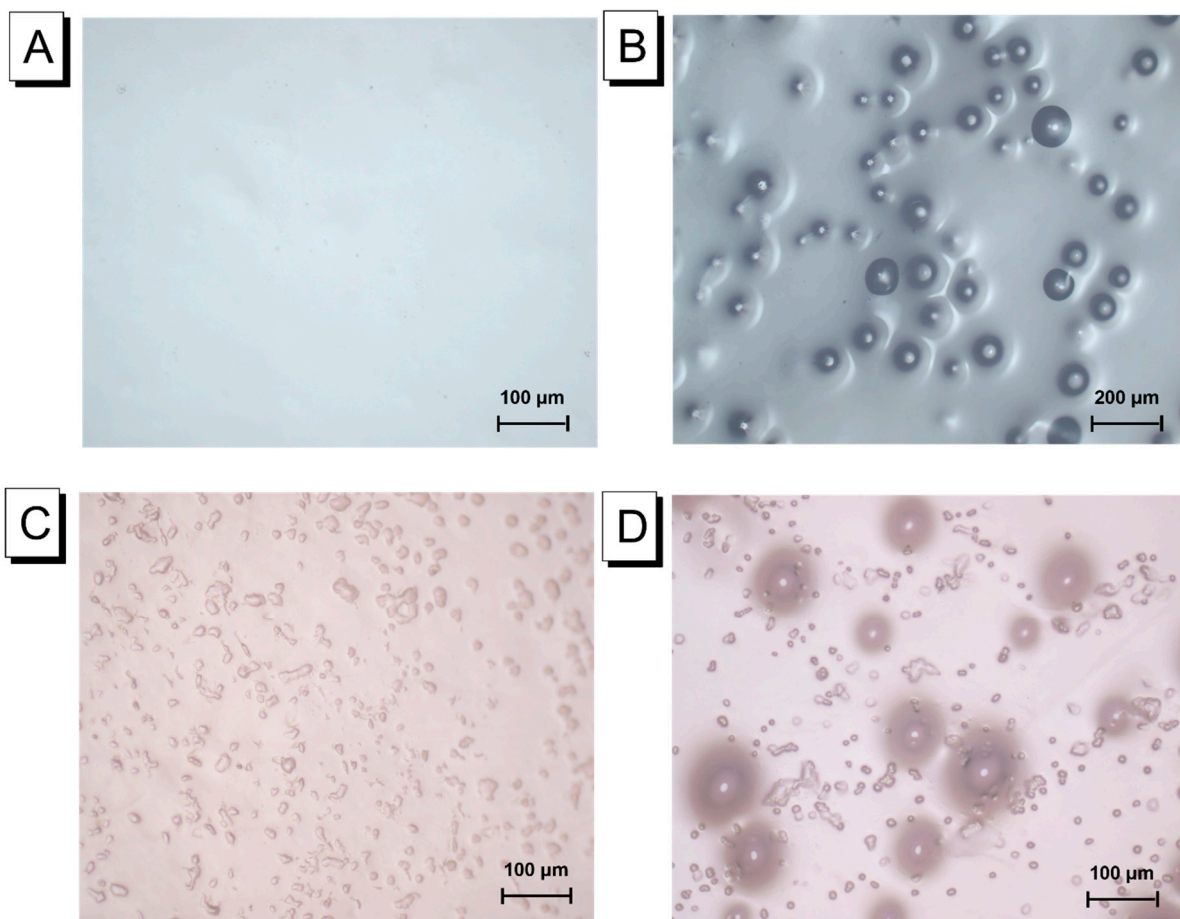

**Figure S10.** The images of optical microscopy in reflected light. (A) **Carrageenan** hydrogel film only, 100 μm; (B) **Carrageenan** hydrogel film + HSA, [HSA] = 2000 mg/L, 200 μm; (C) **Carrageenan** hydrogel film + **TC426**, [TC426] = 10 μM, 100 μm; (D) **Carrageenan** hydrogel film + HSA + **TC426**, [HSA] = 2000 mg/L and [TC426] = 10 μM, 100 μm.

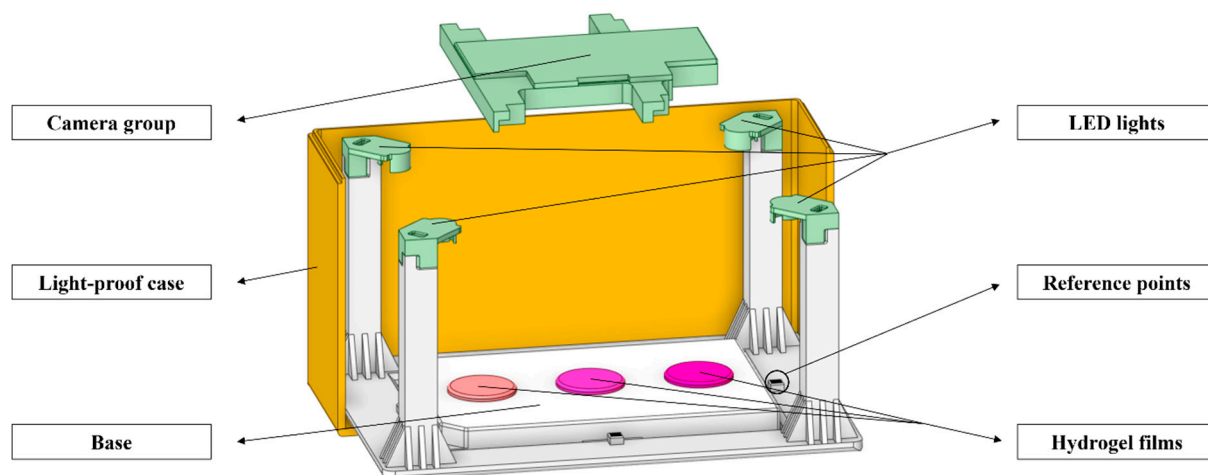

**Figure S11.** The 3D structure of portable colorimetric device for optical imaging analysis; Components illustration including camera group, environmental light-proof case, base, 4 LED modules and 4 reference points (Modified with [s2]).
